# Supplementary material for: Determining PM2.5 calibration curves for a low-cost particle monitor: common indoor residential aerosols
Source: Royal Society of Chemistry journal article supplement (doi:10.1039/c5em00365b), 2015-01-01
Supplement: c5em00365b1.xlsx [file c5em00365b1.xlsx]

## Sheet: Dacunto, et al suppl. info
	Exp ref #	Source Group	Source	Dylos decay rate	Dylos initial value (observed)	Dylos initial value (fitted)	Dylos linear regression R2	SidePak decay rate	SidePak initial value (observed)	SidePak initial value (fitted)	SidePak linear regression R2	power law parameter 1	power law parameter 2	InitRatio (observed)	InitRatio (fitted)	reason results not presented
				a	A	A	R2	b	B	B	R2	m	n	B/A	B/A
				[1/min]	[#/0.01 ft3]	[#/0.01 ft3]	[-]	[1/min]	[#/0.01 ft3]	[#/0.01 ft3]	[-]	[(µg/m3)/ (#/0.01 ft3)]	[-]	[(µg/m3)/ (#/0.01 ft3)]	[(µg/m3)/ (#/0.01 ft3)]
1	5	Bacon	Bacon	0.00841956	33746.5	48278.8	0.942124	0.0135061	514.96	668.071	0.988285	2.04855e-05	1.60413	0.0152597	0.0138378
2	11	Bacon	Bacon	0.0548231	33735	60806.8	0.895872	0.0502038	816.72	708.327	0.99669	0.0294696	0.915741	0.0242099	0.0116488
3	19	Bacon	Bacon	0.00679493	26363	27070.5	0.991728	0.0129129	359.365	353.732	0.998812	1.33443e-06	1.90037	0.0136314	0.013067
4	40	Bacon	Bacon	0.00720223	40927.7	41684.2	0.99383	0.0188465	947.715	944.384	0.998275	7.68795e-10	2.61676	0.0231558	0.0226557
5	72	Bacon	Bacon	0.00249212	44465	44498.1	0.985211	0.00987569	1508.8	1499.32	0.989483	5.69611e-16	3.96277	0.0339323	0.0336939
6	4	Burger	Burger	0.007694	22781.5	28532.8	0.985753	0.0120359	408.1	423.957	0.98954	4.54726e-05	1.56432	0.0179137	0.0148586
7	8	Burger	Burger	0.00648432	35493.5	67494.3	0.960901	0.00726712	1055.6	1112.2	0.989031	0.00430446	1.12072	0.0297407	0.0164785
8	12	Burger	Burger	0.0680687	9238	14997.5	0.809885	0.0486	139	156.743	0.98675	0.163522	0.713985	0.0150465	0.0104513	low peak response
9	43	Burger	Burger	0.0306531	14959.5	15670.9	0.997127	0.0341934	207	195.831	0.99664	0.00409513	1.1155	0.0138374	0.0124964
10	55	Burger	Burger	0.0252779	5997.5	5823.88	0.994345	0.0291805	51	44.2335	0.969805	0.00199173	1.15439	0.00850354	0.0075952	low peak response
11	6	Chicken	Chicken	0.00761924	8958	9742.5	0.994014	0.00736687	52	42.431	0.987551	0.00590371	0.966878	0.00580487	0.00435525	low peak response
12	14	Chicken	Chicken	0.0400209	8753	12387.2	0.882253	0.0447631	73.06	83.6493	0.969868	0.00221054	1.11849	0.00834685	0.00675287	low peak response
13	16	Chicken	Chicken	0.0052278	32381	37279.6	0.949941	0.00872276	653.38	652.892	0.994063	1.53885e-05	1.66853	0.0201779	0.0175134
14	23	Chicken	Chicken	0.00889044	23766.5	25740.8	0.984084	0.0142476	533.26	529.538	0.998703	4.52421e-05	1.60258	0.0224375	0.0205719
15	26	Chicken	Chicken	0.00688741	17134.1	17653	0.988229	0.00938153	281.58	268.812	0.996348	0.000441313	1.36213	0.0164339	0.0152276
16	57	Chicken	Chicken	0.0120143	31903	33213.3	0.988935	0.0235483	1248.78	1210.07	0.997202	1.6632e-06	1.96002	0.039143	0.0364332
17	64	Chicken	Chicken	0.00980497	32098	37925.3	0.962448	0.0143132	1386.84	1323.57	0.999219	0.000273811	1.45979	0.0432064	0.0348994
18	65	Chicken	Chicken	0.00513357	29570	30115.6	0.974313	0.0118608	1289.6	1283.22	0.998627	5.75899e-08	2.31043	0.0436118	0.0426098
19	1	Cigarette	Cigarette	0.0092217	36968.5	50678.9	0.908553	0.00818344	395.36	400.92	0.997634	0.0267883	0.88741	0.0106945	0.00791098	anomalous discontinuity
20	2	Cigarette	Cigarette	0.0099664	34605.5	52563.1	0.897226	0.0079863	332.64	341.072	0.995497	0.0562418	0.801322	0.00961234	0.00648881	irregular background
21	3	Cigarette	Cigarette	0.00922049	33315.5	42067.9	0.895395	0.00766966	363.04	341.279	0.998612	0.0486272	0.831806	0.010897	0.00811257	anomalous discontinuity
22	7	Cigarette	Cigarette	0.0103539	33216	53356.2	0.9062	0.00563796	331.52	312.187	0.994783	0.832436	0.544524	0.00998073	0.005851	anomalous discontinuity
23	17	Cigarette	Cigarette	0.00513067	48449	88274.1	0.917142	0.00539626	742.4	658.816	0.998018	0.00413907	1.05177	0.0153233	0.0074633
24	20	Cigarette	Cigarette	0.00494378	38349	37230.3	0.998095	0.00913127	394.56	365.048	0.994245	1.31766e-06	1.84702	0.0102887	0.00980513
25	24	Cigarette	Cigarette	0.0236333	26301	38871.8	0.905551	0.0086729	320.48	301.578	0.99721	6.23889	0.366978	0.0121851	0.00775828	irregular background
26	61	Cigarette	Cigarette	0.00688142	35400	36827.2	0.96211	0.0124074	446.08	435.231	0.995704	2.5457e-06	1.80302	0.0126011	0.0118182
27	62	Cigarette	Cigarette	0.00858654	35747	38780.9	0.970911	0.0131827	386.88	372.843	0.996567	3.36305e-05	1.53528	0.0108227	0.00961407
28	67	Cigarette	Cigarette	0.00372078	55569	56203.7	0.969302	0.0123108	1674.56	1650.49	0.986736	3.17869e-13	3.30866	0.0301348	0.0293662
29	69	Cigarette	Cigarette	0.00429388	47183	47120.3	0.997684	0.00956172	1402.88	1358.66	0.998719	5.32962e-08	2.22682	0.0297327	0.0288338
30	70	Cigarette	Cigarette	0.0033247	53703	53930.3	0.991622	0.00998503	1868.8	1803.04	0.997075	1.10905e-11	3.00329	0.0347988	0.0334327
31	15	Mixed-Cig	Bacon + Cig	0.00503538	43291	51294	0.959664	0.00805331	637.14	634.985	0.999301	1.86098e-05	1.59935	0.0147176	0.0123793
32	21	Mixed-Cig	Bacon + Cig	0.00822579	20474.7	24960.4	0.964172	0.0105261	538.125	494.811	0.997041	0.00116823	1.27964	0.0262825	0.0198238
33	25	Mixed-Cig	Chicken + Cig	0.00642185	43003.1	53042.2	0.940756	0.0101332	1088.7	1077.26	0.999128	3.77738e-05	1.57793	0.0253168	0.0203095
34	30	Mixed-Cig	Toast + Cig	0.00841956	38245.2	41092.6	0.969539	0.0124455	587.86	587.779	0.996453	8.89873e-05	1.47816	0.0153708	0.0143038
35	35	Mixed-Cig	Stick Incense T1 + Cig	0.00401617	45048	49037.7	0.972992	0.00766775	646.88	664.436	0.997587	7.36567e-07	1.90922	0.0143598	0.0135495
36	37	Mixed-Cig	Cone Incense T2 + Cig	0.00606184	36613.1	36427	0.998838	0.0112887	558.88	541.112	0.99791	1.73282e-06	1.86226	0.0152645	0.0148547
37	39	Mixed-Cig	Stick Insence T3 + Cig	0.00547564	40044.5	39661.7	0.998569	0.0110976	480.24	462.196	0.997128	2.21434e-07	2.02671	0.0119927	0.0116535
38	66	Mixed-Cig	Stick Insence T3 + Cig	0.00565694	47325	43502.6	0.987168	0.0133251	775.62	661.203	0.99444	7.83757e-09	2.35553	0.0163892	0.0151991
39	33	Other-Combust	Candles	0.00718577	24922.5	25704.1	0.995712	0.0104009	137.27	134.263	0.997321	5.55622e-05	1.44743	0.00550787	0.00522341
40	36	Other-Combust	Cone Incense	0.0062774	6431.5	4439.63	0.716749	0.008079	254.29	247.941	0.997949	0.00501441	1.287	0.0395382	0.0558473	anomalous discontinuity
41	47	Other-Combust	Candles	0.0129237	24536	24777.6	0.999636	0.0188708	159.095	154.388	0.99167	5.92327e-05	1.46017	0.00648415	0.00623095
42	50	Other-Combust	Synth Log	0.0061847	34204	34462.6	0.998616	0.0112117	1568.15	1441.26	0.989293	8.57755e-06	1.81282	0.0458471	0.0418208
43	51	Other-Combust	Wood	0.00668259	37777.8	37735.3	0.996648	0.0122551	1059.52	924.802	0.982084	3.73968e-06	1.83388	0.0280461	0.0245076
44	52	Other-Combust	Wood	0.0218095	25206.2	26885.9	0.98629	0.0164333	765.38	686.127	0.995029	0.315351	0.753491	0.0303648	0.0255199	irregular background
45	53	Other-Combust	Cone Incense	0.0242566	3715	4098.69	0.930961	0.0251776	267.27	215.84	0.994635	0.0383989	1.03797	0.0719435	0.0526608	anomalous discontinuity
46	71	Other-Combust	Cone Incense	0.00400338	36401	36211.6	0.985902	0.00942137	2486.85	2418.61	0.991921	4.51827e-08	2.35336	0.0683182	0.0667909
47	22	Other-Cook	Pork Chops	0.00848632	25338.8	32814.3	0.963532	0.0133536	371.15	457.061	0.988159	3.57911e-05	1.57354	0.0146475	0.0139287
48	28	Other-Cook	Salmon	0.0123771	9025.92	12024.9	0.978365	0.0141345	312.84	364.386	0.995607	0.00798267	1.14199	0.0346602	0.0303025	low peak response
49	31	Other-Cook	Micro Popcorn	0.00948433	13028.6	12693.9	0.990961	0.0150874	87.175	83.536	0.978254	2.47742e-05	1.59077	0.00669105	0.00658077	low peak response
50	32	Other-Cook	Burned Micro Popcorn	0.0114031	32097.5	37148.4	0.987714	0.0183164	449.4	409.162	0.996898	1.86806e-05	1.60626	0.0140011	0.0110143
51	44	Other-Cook	Pork Chops	0.0155285	16564.5	17592.9	0.984396	0.0250837	293.15	311.008	0.994376	4.3166e-05	1.61533	0.0176975	0.017678
52	45	Other-Cook	Toast	0.0134997	28670.5	28784.9	0.995795	0.0228575	391.04	377.117	0.997762	1.06241e-05	1.69318	0.0136391	0.0131012
53	46	Other-Cook	French Fries	0.0163486	8959.5	8582.33	0.994331	0.0222544	114.975	101.181	0.967788	0.000447198	1.36124	0.0128327	0.0117894	low peak response
54	48	Other-Cook	Pizza	0.119977	1385	2953.63	0.75982	0.118582	147.6	150.784	0.912348	0.0560223	0.988369	0.10657	0.0510503	low peak response
55	49	Other-Cook	Oven Drippings	0.0121909	39805.8	38987.9	0.995311	0.0205529	1307.09	1151.19	0.988716	2.09497e-05	1.68593	0.0328366	0.0295269
56	54	Other-Cook	Sausage	0.0134153	32843.2	33698.2	0.974527	0.0286043	904.22	835.939	0.994825	1.85519e-07	2.13221	0.0275314	0.0248067
57	58	Other-Cook	French Fries	0.0274881	11343	11260.7	0.993589	0.0333586	88.11	86.7589	0.986624	0.00105071	1.21356	0.00776779	0.0077046	low peak response
58	9	Stick Incense	Stick Incense	0.00689242	28364	27665.9	0.994608	0.00712396	191.625	166.999	0.994559	0.00428107	1.03359	0.00675592	0.00603626
59	34	Stick Incense	Stick Incense	0.00638298	34819.5	33709.3	0.993798	0.0115672	292.25	252.882	0.97591	1.57666e-06	1.8122	0.00839329	0.00750184
60	34.5	Stick Incense	Stick Incense	0.00474027	37649.1	38025.3	0.995784	0.00993833	391.3	380.45	0.996665	9.50238e-08	2.09658	0.0103934	0.0100052
61	38	Stick Incense	Stick Incense	0.00542952	26112	25630.5	0.997531	0.00775732	202.475	191.499	0.987439	9.62137e-05	1.42873	0.0077541	0.00747153
62	41	Stick Incense	Stick Incense	0.00742435	35327.5	35499.3	0.9983	0.0145947	310.275	300.373	0.994727	3.4109e-07	1.96579	0.00878282	0.00846138
63	42	Stick Incense	Stick Incense	0.0143521	24008	24148.8	0.997413	0.019052	180.95	173.759	0.995889	0.000264096	1.32748	0.00753707	0.00719537
64	63	Stick Incense	Stick Incense	0.00800522	36928	36494.2	0.996602	0.0145294	420.35	369.067	0.99733	1.93514e-06	1.81499	0.011383	0.010113
